# Supplementary material
Source: bioRxiv or medRxiv preprint supplement (https://www.biorxiv.org/highwire/filestream/75909/field_highwire_adjunct_files/1/241760-2.pdf)

Karasov, Figure S2

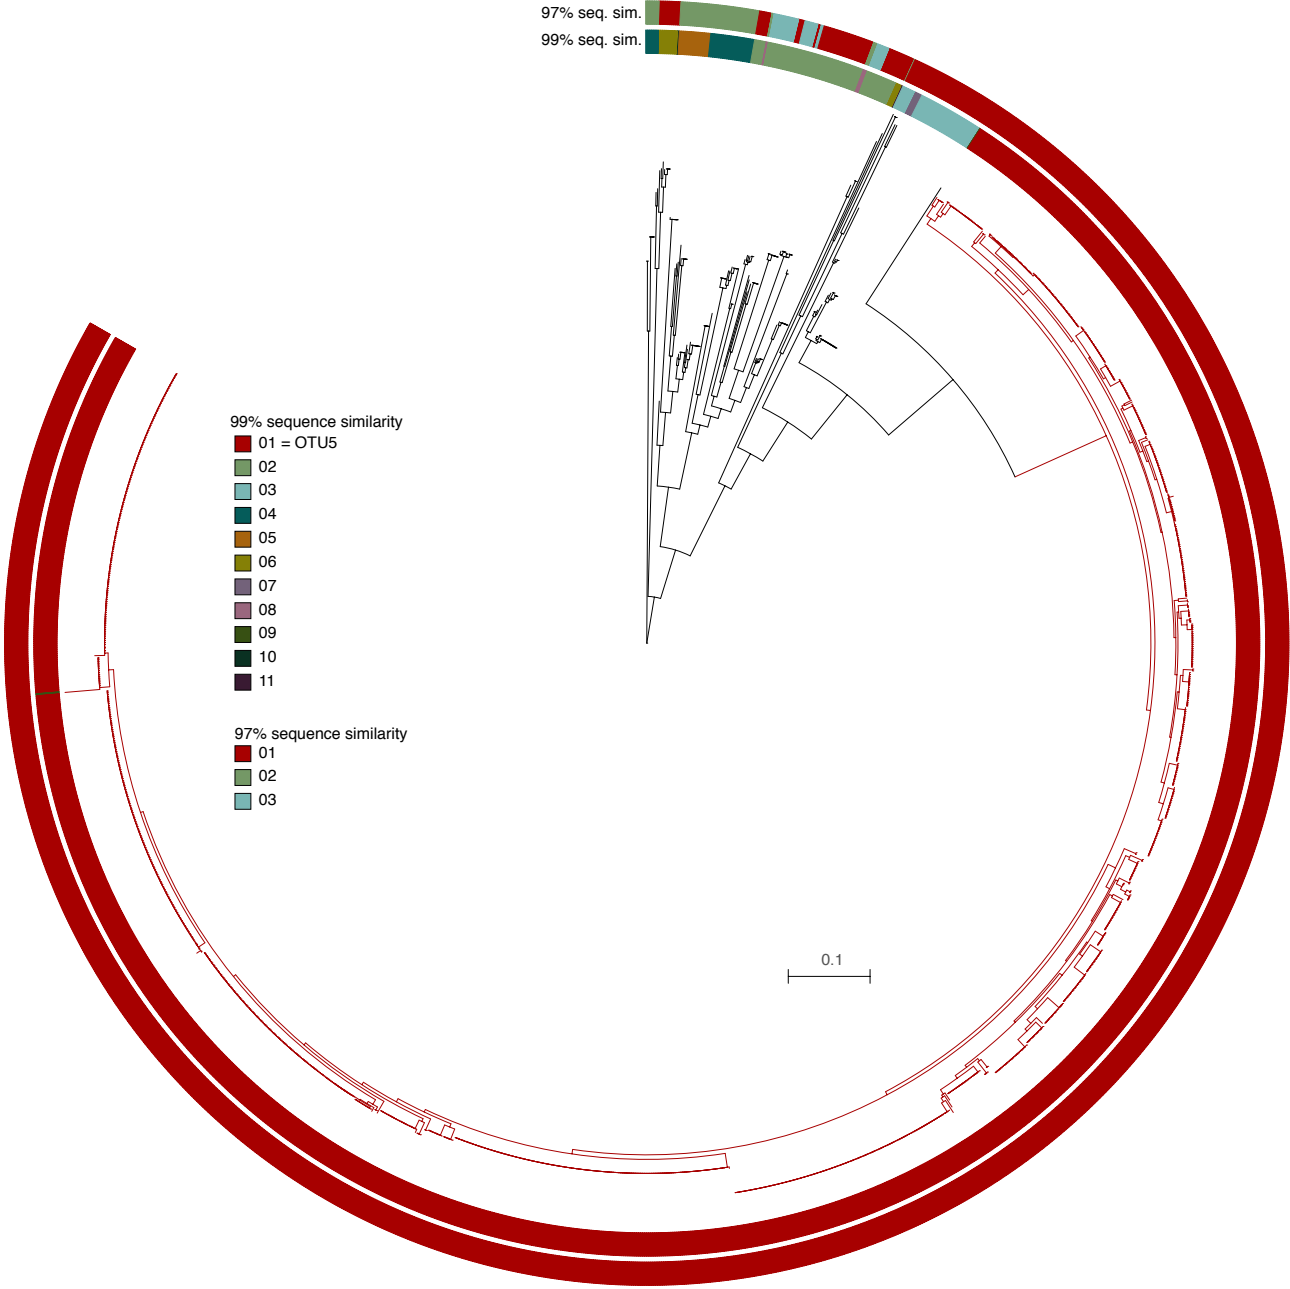

Supplement: Supplementary file [file 241760-2.pdf]
